# Supplementary material
Source: MDPI journal article supplement (https://www.mdpi.com/2073-4352/12/2/283)
Supplement: s1 [file s1]

## Temperature resolved anisotropic displacement parameters from theory and experiment: a case study

D. Mroz, R. Wang, C. Paulmann, U. Englert,\* R. Dronskowski\*

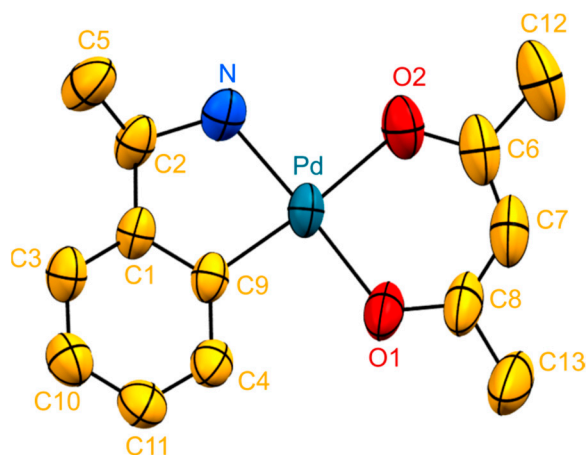

**Figure S1** Displacement ellipsoids in the harmonic approximation for compound **1** at 130 K, drawn at the 90% probability level.

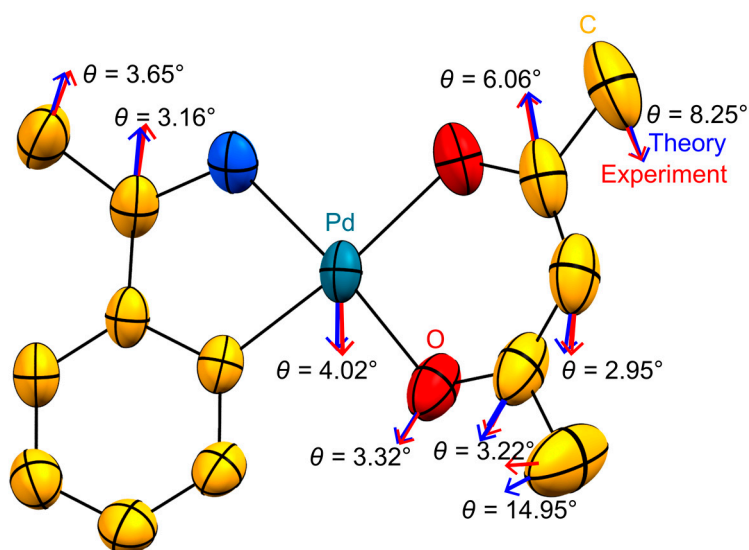

**Figure S2** Comparison of the orientation of theoretical (blue) and experimental (red) main axis components for sufficiently anisotropic ( $U_{\max}/U_{\min} > 2$ ) thermal ellipsoids, given for the high resolution control experiment at 100 K (90% probability).

The structure is drawn in the theoretically predicted crystallographic coordinate system. The deviation angles are given next to the corresponding atom.

**Table S1** Deviation angles between experiment and theory (harmonic approximation) in the temperature range 150 - 250 K for the atoms shown in Fig. S1.

| Angle for atom (°) | 150 K | 170 K | 190 K | 210 K | 230 K | 250 K |
|--------------------|-------|-------|-------|-------|-------|-------|
| Pd                 | 3.11  | 2.98  | 2.99  | 3.02  | 2.93  | 2.97  |
| O1                 | 4.86  | 4.82  | 5.41  | 5.79  | 5.95  | 5.84  |
| O2                 | 2.78  | 2.57  | 2.44  | 3.48  | 3.14  | 3.40  |
| N1                 | 5.53  | 5.09  | 5.86  | 4.98  | 5.60  | 4.29  |
| C1                 | 2.98  | 1.89  | 2.22  | 1.86  | 2.91  | 2.72  |
| C2                 | 1.36  | 1.03  | 1.80  | 2.110 | 2.62  | 2.80  |
| C3                 | 1.16  | 1.07  | 1.72  | 0.65  | 0.89  | 1.53  |
| C4                 | 10.53 | 9.9   | -     | 9.71  | -     | 12.04 |
| C5                 | 3.12  | 3.58  | 4.28  | 6.21  | 7.92  | 8.79  |
| C6                 | 3.44  | 4.09  | 3.82  | 4.42  | 4.16  | 5.04  |
| C7                 | 4.02  | 4.06  | 3.34  | 3.28  | 3.87  | 3.44  |
| C8                 | 5.51  | 5.78  | 5.19  | 4.63  | 7.18  | 6.19  |
| C9                 | 4.71  | 4.29  | 4.35  | 4.33  | 5.29  | 5.01  |
| C10                | -     | -     | 10.52 | 10.50 | 9.27  | 8.05  |
| C11                | -     | -     | -     | -     | -     | -     |
| C12                | 9.75  | 9.08  | 8.78  | 7.51  | 6.76  | 6.35  |
| C13                | 11.87 | 11.49 | 11.99 | 10.82 | 11.20 | 10.91 |

**Table S2** As in Table S1, but for the quasi-harmonic approximation at 170 K.

| Angle for atom (°) | 170 K |
|--------------------|-------|
| Pd                 | 1.94  |
| O1                 | 1.56  |
| O2                 | 2.13  |
| N1                 | 1.72  |
| C1                 | 0.47  |
| C2                 | 3.52  |
| C3                 | 2.18  |
| C4                 | 5.06  |
| C5                 | 1.28  |
| C6                 | 4.82  |
| C7                 | 3.52  |
| C8                 | 1.19  |
| C9                 | 1.61  |
| C10                | -     |
| C11                | -     |
| C12                | 9.46  |
| C13                | 12.04 |

**Table S3** Summary of crystal data, data collection parameters and convergence results for all diffraction data on **1**.

Common features for refinements at all temperatures: chemical composition  $C_{13}H_{17}NO_2Pd$ , tetragonal space group  $P4_1$  (76),  $Z = 4$ , 157 refined variables.

| $T$ [K]                                        | 100            | 130            | 150            | 170            |
|------------------------------------------------|----------------|----------------|----------------|----------------|
| crystal size [mm <sup>3</sup> ]                | 0.22·0.07·0.04 | 0.12·0.04·0.04 | 0.12·0.04·0.04 | 0.12·0.04·0.04 |
| $a$ [Å]                                        | 10.5607(17)    | 10.56720(18)   | 10.57390(18)   | 10.57980(18)   |
| $c$ [Å]                                        | 11.9201(9)     | 11.9841(2)     | 12.0054(2)     | 12.0233(2)     |
| $V$ [Å <sup>3</sup> ]                          | 1329.4(4)      | 1338.21(5)     | 1342.29(5)     | 1345.79(5)     |
| $\sin\theta_{\max}/\lambda$ [Å <sup>-1</sup> ] | 1.111          | 0.832          | 0.833          | 0.831          |
| total no. of refls.                            | 174274         | 40794          | 41033          | 41211          |
| indep refls.                                   | 15292          | 5979           | 6038           | 6031           |
| refls. $I > 2\sigma(I)$                        | 12239          | 5872           | 5912           | 5877           |
| $R1$                                           | 0.0274         | 0.0175         | 0.0170         | 0.0165         |
| $wR2$                                          | 0.0594         | 0.0478         | 0.0465         | 0.0464         |
| GOF                                            | 1.066          | 1.118          | 1.039          | 1.084          |
| Flack parameter <sup>a</sup>                   | 0.029(2)       | 0.049(6)       | 0.027(6)       | 0.046(7)       |
| CCDC dep. no.                                  | 2143154        | 1997131        | 1997132        | 1997133        |

| $T$ [K]                                        | 190            | 210            | 230            | 250            |
|------------------------------------------------|----------------|----------------|----------------|----------------|
| crystal size [mm <sup>3</sup> ]                | 0.12·0.04·0.04 | 0.12·0.04·0.04 | 0.12·0.04·0.04 | 0.12·0.04·0.04 |
| $a$ [Å]                                        | 10.58700(18)   | 10.59500(18)   | 10.60060(18)   | 10.60730(18)   |
| $c$ [Å]                                        | 12.0458(2)     | 12.0688(2)     | 12.0908(2)     | 12.1138(2)     |
| $V$ [Å <sup>3</sup> ]                          | 1350.15(5)     | 1354.77(5)     | 1358.68(5)     | 1362.98(5)     |
| $\sin\theta_{\max}/\lambda$ [Å <sup>-1</sup> ] | 0.830          | 0.830          | 0.829          | 0.828          |
| total no. of refls.                            | 41031          | 41303          | 41530          | 41908          |
| indep refls.                                   | 5978           | 5997           | 6024           | 6044           |
| refls. $I > 2\sigma(I)$                        | 5806           | 5769           | 5753           | 5730           |
| $R1$                                           | 0.0166         | 0.0162         | 0.0165         | 0.0163         |
| $wR2$                                          | 0.0474         | 0.0473         | 0.0462         | 0.0453         |
| GOF                                            | 1.057          | 1.044          | 1.116          | 1.050          |
| Flack parameter <sup>a</sup>                   | 0.045(8)       | 0.041(7)       | 0.042(7)       | 0.052(8)       |
| CCDC dep. no.                                  | 1997134        | 1997135        | 1997136        | 1997137        |

<sup>a</sup> H. D. Flack, *Acta Crystallogr.* **1983**, *A39*, 876–881.
